# Supplementary material for: A novel gamma radiation-inactivated sabin-based polio vaccine
Source: PubMed Central journal article supplement (PMC6991977; doi:10.1371/journal.pone.0228006), 2020-01-30

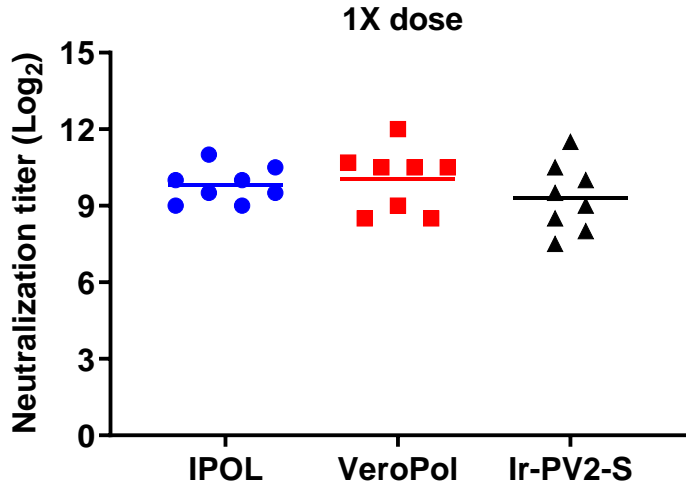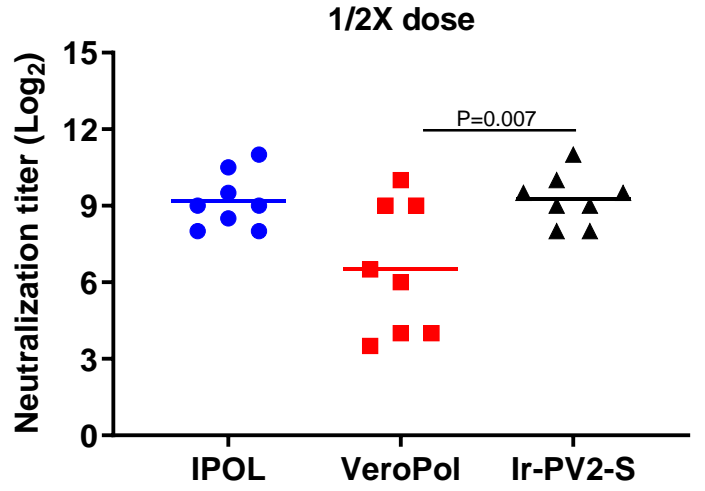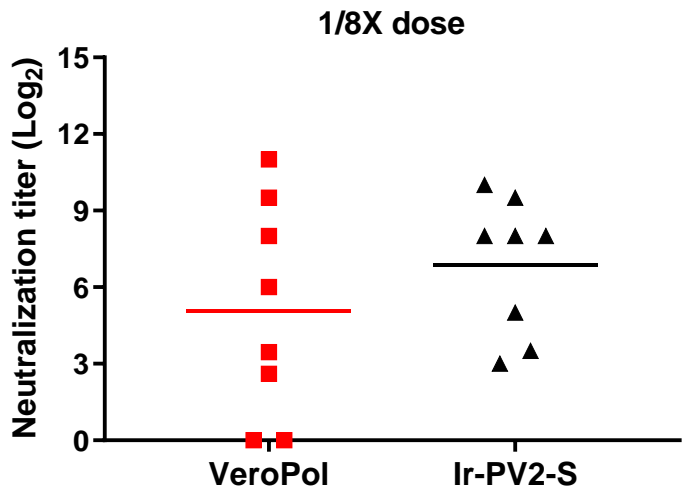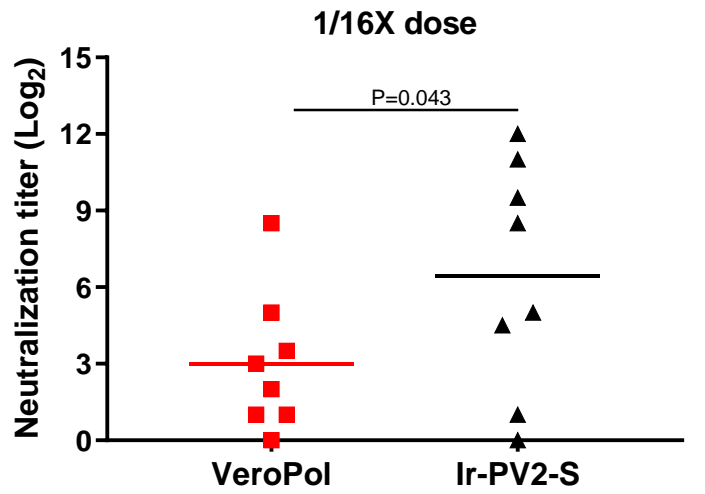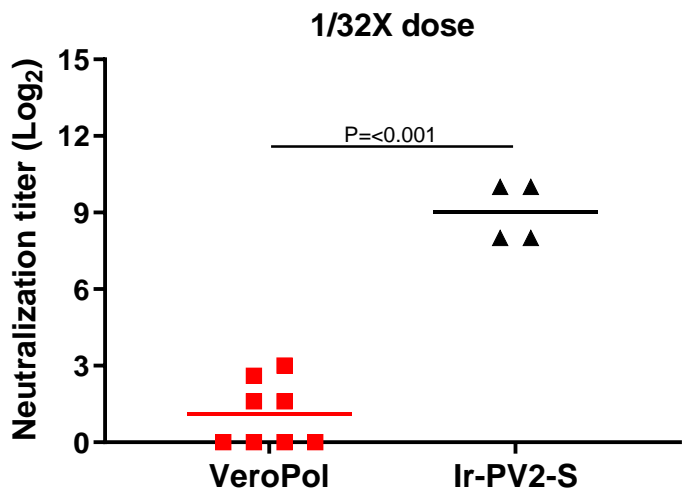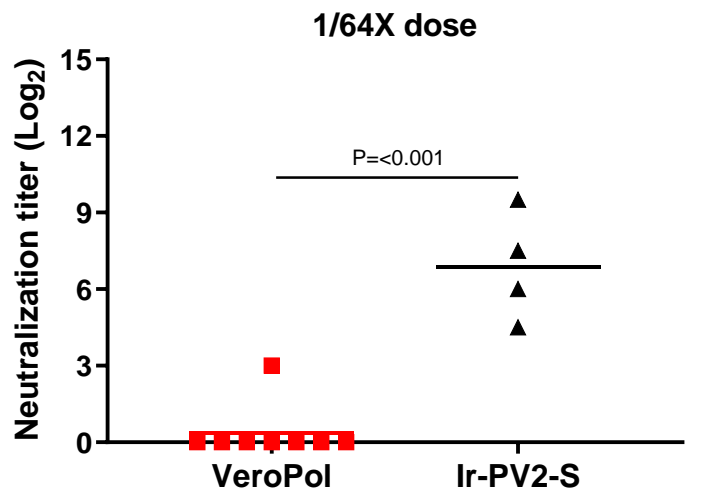

Supplement: pone.0228006.s003.pdf [file pone.0228006.s003.pdf]
